000  
001  
002  
003  
004  
005  
006  
007  
008  
009  
010  
011  
012  
013  
014  
015  
016  
017  
018  
019  
020  
021  
022  
023  
024  
025  
026  
027  
028  
029  
030  
031  
032  
033  
034  
035  
036  
037  
038  
039  
040  
041  
042  
043  
044  
045  
046  
047  
048  
049  
050  
051  
052  
053

---

# GERV: A Statistical Method for Generative Evaluation of Regulatory Variants for Transcription Factor Binding

---

Haoyang Zeng<sup>1</sup>, Tatsunori Hashimoto<sup>1</sup>, Daniel D Kang<sup>1</sup>, David K Gifford<sup>1,2,\*</sup>

<sup>1</sup>Computer Science and Artificial Intelligence Laboratory, Massachusetts Institute of Technology, Cambridge, MA 02142, USA

<sup>2</sup>Department of Stem Cell and Regenerative Biology, Harvard University and Harvard Medical School, Cambridge, MA 02138, USA

\* Email: [gifford@mit.edu](mailto:gifford@mit.edu)

## Abstract

The majority of disease-associated variants identified in genome-wide association studies (GWAS) reside in noncoding regions of the genome with regulatory roles. Thus being able to interpret the functional consequence of a variant is essential for identifying causal variants in the analysis of GWAS studies. We present GERV (Generative Evaluation of Regulatory Variants), a novel computational method for predicting regulatory variants that affect transcription factor binding. GERV learns a k-mer based generative model of transcription factor binding from ChIP-seq and DNase-seq data, and scores variants by computing the change of predicted ChIP-seq reads between the reference and alternate allele. The k-mers learned by GERV capture more sequence determinants of transcription factor binding than a motif-based approach alone, including both a transcription factor's canonical motif as well as associated co-factor motifs. We show that GERV outperforms existing methods in predicting SNPs associated with allele-specific binding. GERV correctly predicts a validated causal variant among linked SNPs, and prioritizes the variants previously reported to modulate the binding of FOXA1 in breast cancer cell lines. Thus, GERV provides a powerful approach for functionally annotating and prioritizing causal variants for experimental follow-up analysis. The implementation of GERV and related data are available at <http://gerv.csail.mit.edu/>

## 1 Introduction

Genome-Wide Association Studies (GWAS) have revealed genetic polymorphisms that are strongly associated with complex traits and diseases ([21, 20, 27, 12]). Missense and nonsense variants that occur in protein coding sequences are simple to characterize. However, many GWAS detected variants reside in non-coding regions with regulatory function ([12, 7]). The influence of non-coding variation on gene expression and other cellular functions is not well understood. Previous work has observed that non-coding DNA changes in the recognition sequences of transcription factors can affect gene expression and cellular phenotypes ([31]). Thus predicting the effect of genomic variants on TF binding is an essential part of interpreting the role of non-coding variants in pathogenesis. Most of existing computational approaches to predict the effect of SNPs on TF binding such as sTRAP and HaplogReg are based on quantifying the difference between the presented reference and alternate alleles in the context of canonical TF binding motifs ([1, 17, 19, 24, 30, 22, 28]). Recent work ([14]) uses k-mer weights learned from a gapped-kmer SVM ([9]) to score the effect of variants, taking into account the frequency of k-mer occurrences but not the spatial effect of k-mers.

054  
055  
056  
057  
058  
059  
060  
061  
062  
063  
064  
065  
066  
067  
068  
069  
070  
071  
072  
073  
074  
075  
076  
077  
078  
079  
080  
081  
082  
083  
084  
085  
086  
087  
088  
089  
090  
091  
092  
093  
094  
095  
096  
097  
098  
099  
100  
101  
102  
103  
104  
105  
106  
107

Here we present GERV (Generative Evaluation of Regulatory Variants), a novel computational model that learns the spatial effect of k-mers on TF binding *de novo* from whole-genome ChIP-seq and DNase-seq data, and scores variants by the change in predicted ChIP-seq read counts between the reference and alternate alleles. GERV improves on existing models in three ways. First, GERV doesn't assume the existence of a canonical TF binding motif. Instead it models transcription factor binding by learning the effects of specific k-mers on observed binding. This allows GERV to capture more subtle sequence features underlying transcription factor binding including non-canonical motifs. Second, GERV accounts for the spatial effect of k-mers and learns the effect of cis-regulatory regions outside of the canonical TF motif. This enables us to model the role of important auxiliary sequences in transcription factor binding, such as cofactors. Third, GERV incorporates chromatin openness information as a covariate in the model which boosts the accuracy of the predicted functional consequence of a variant.

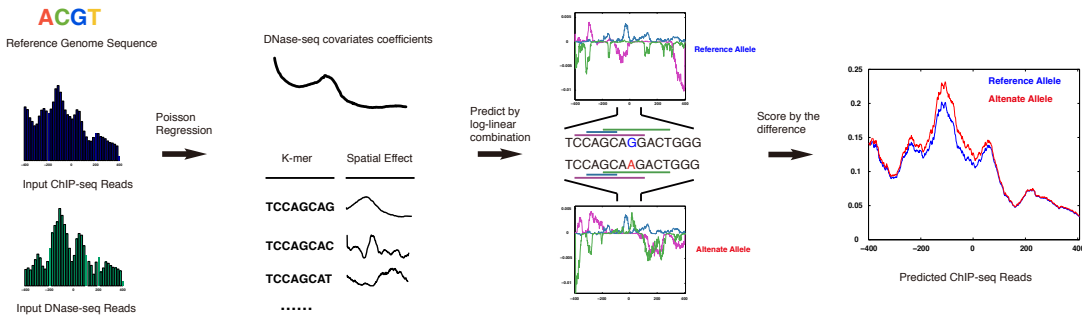

Figure 1: The schematic of GERV. The spatial effects of all the k-mers and the coefficients for DNase-seq covariates are learned from the reference genome sequence and ChIP-seq, DNase-seq datasets. Then the spatial effects (purple, cyan and green) of the k-mers underlying the reference (blue) and alternate (red) allele for a variant are aggregated with DNase-seq covariates by log-linear combination to yield a spatial prediction of local ChIP-seq reads for the two alleles. GERV scores the variant by the  $l^2$ -norm of the predicted change of reads.

We first demonstrate the power of GERV on the ChIP-seq data for transcription factor NF- $\kappa$ B. We show that GERV learns a vocabulary of k-mers that accurately predicts held-out NF- $\kappa$ B ChIP-seq data and captures the canonical NF- $\kappa$ B motifs as well as associated sequences such as known cofactors. Applying GERV to six transcription factors on which allele-specific binding (ASB) analysis is available, we show GERV outperforms existing approaches in prioritizing SNPs associated with allele-specific binding. We demonstrate the application of GERV in post-GWAS analysis by scoring risk-associated SNPs and their linked SNPs for breast cancer, and show that GERV trained on FOXA1 ChIP-seq data achieves superior performance in prioritizing SNPs previously reported to modulate FOXA1 binding in breast cancer cell lines.

## 2 Methods

### 2.1 GERV Model Overview

GERV is a fully generative model of ChIP-seq reads. We assume that the genome is a long regulatory sequence containing k-mer “code words” that induce invariant spatial effects on proximal transcription factor binding. We use the level of chromatin openness in a region as a functional prior to predict the magnitude of a sequence-induced binding signal. Following this assumption, we model the read counts produced by transcription factor ChIP-seq at a given base as the log-linear combination of the DNase-seq signal on nearby bases and the spatial effect of a set of learned k-mers whose effect range covers that base.

The GERV procedure of variant scoring consists of the following three steps: (Figure 1)

1. GERV first learns the spatial effect of all k-mers ( $k=1$  to 8) and the covariate coefficient of local DNase-seq signal over a spatial window of  $\pm 200$  base pairs (bp) *de novo* from ChIP-seq data using regularized Poisson regression
2. GERV then computes the predicted ChIP-seq read counts for the reference and alternate allele of a variant from the log-linear combination of the local DNase-seq signal and spatial effect of the learned k-mers.
3. GERV predicts the effect of a genomic variant on transcription factor binding by the  $l^2$ -norm of the change of predicted reads between two alleles

## 2.2 Learning the Spatial Effect of K-mers

The effect profile of a k-mer is defined as a real-valued vector of length  $2M$  that corresponds to a spatial window of  $[-M, M - 1]$  relative to the start position of the k-mer. Specifically, the  $j$ -th entry of the profile for a k-mer is the expected log-change in read counts at the  $j$ -th base relative to the start of the k-mer. Here we consider k-mers with  $k$  from 1 to 8 ( $k_{max} = 8$ ) as this is the maximum that would fit in memory in an Amazon EC2 c3.8 xlarge instance. Larger K-mers tested on a larger memory machine did not perform substantially better than 8-mers. As ChIP-seq signals are relatively sparse and spikey, we chose an effect range of  $\pm 200$  bp for each k-mer ( $M = 200$ ).

For notational convenience we use  $i$  for genomic coordinate,  $k$  for k-mer length, and  $j$  for coordinate offset from the start of a k-mer. We assume that the genome consists of one large chromosome with coordinate 0 to  $N$ . In practice we will construct this by concatenating chromosomes with the telomeres acting as a spacer. We represent the effect vector of all k-mers of length  $k$  as a parameter matrix  $\theta^k$  of size  $4^k \times 2M$ . For any particular k-mer of length  $k$  starting at base  $i$  on the reference genome, we define  $g_i^k$  as its row index in  $\theta^k$ . So  $\theta_{(g_i^k, j)}^k$  would denote the effect of this kmer at offset  $j \in [-M, M - 1]$ . Additionally, a special parameter  $\theta_0$  is used to set the average read rate of the genome globally.

The DNase-seq covariate  $\kappa$  is defined as a vector of length  $N$  that is aligned with each base of the genome, and we assume that ChIP-seq reads can be predicted with this covariate and the contributions from surrounding k-mers. The regression coefficients for the covariate are defined as  $\beta$  and have length  $2L$ . The regression coefficients  $\beta$  can be thought of as analogous to the k-mer effect  $\theta$ , but occurring everywhere, and scaled by the covariate  $\kappa$ . In all the experiments in this analysis, we chose an  $L = 200$  to balance between computational complexity and prediction power.

Given these definitions, we define a generative model for ChIP-seq reads on the genome. Observed counts at position  $i$  on the genome are generated from a Poisson distribution with rate parameter  $\lambda_i$  which is defined as:

$$\lambda_i = \exp \left( \left( \sum_{k \in [1, k_{max}]} \sum_{j \in [-M, M-1]} \theta_{(g_{i+j}^k, -j)}^k \right) + \left( \sum_{l \in [0, 2L]} \beta_l \times \kappa_{i+l-L} \right) - \theta_0 \right) \quad (1)$$

The problem we solve is a regularized Poisson regression. Particularly, we would like to maximize the following:

$$\max_{\theta, \beta} \left\{ \sum_i c_i \log(\lambda_i) - \lambda_i - \eta \sum \|\theta^k\|_1 \right\} \quad (2)$$

To efficiently optimize this objective function, we performed an accelerated gradient descent method. The detail of implementation can be found in the supplementary data (Supplementary Text S1).

## 2.3 ChIP-seq Signal Prediction for Reference and Alternate Allele

In step 2, given the effect profile of all the k-mers and coefficients of the DNase-seq covariate trained from step 1, we first predict the ChIP-seq count  $\lambda$  at each position across the reference genome by

162 combining the effect of proximal k-mers and DNase-seq level into the log-linear model using equa-  
163 tion 1. Then in similar manner, we predict the read counts  $\lambda'$  of the alternate allele after replacing  
164 the k-mers that are affected by the variant. If we assume a Single Nucleotide Polymorphism (SNP),  
165 at most  $\frac{4}{3} \times (4^{k_{max}} - 1)$  k-mers will change.

## 167 2.4 Variant Scoring

168  
169 In step 3, we score a SNP at locus on the genome by the square root of the sum of squared per-base  
170 change ( $l^2$ -norm of the change) of binding signal at all bases within the effect range of any k-mers  
171 affected by the variant:

$$172 \quad 173 \quad 174 \quad 175 \quad 176 \quad 177 \quad s_i = \sqrt{\sum_{j \in [-M - k_{max} + 1, M - 1]} (\lambda'_{i+j} - \lambda_{i+j})^2} \quad (3)$$

## 178 2.5 Collapsing GERV k-mers into a position weight matrix

179 We interpret the active k-mers captured by GERV with a post-processing framework that aggregates  
180 similar k-mers into position weight matrixes (PWMs):

- 181 1. We filter k-mers based on the sum of spatial effect to eliminate inactive k-mers.
- 182 2. We calculate the Levenshtein distance (number of single character edits) between the re-  
183 maining k-mers.
- 184 3. We perform UPGMA hierarchical clustering over the candidate k-mers until the minimal  
185 distance among clusters is larger than 2.
- 186 4. For each cluster, we define its key k-mer as the one with the largest sum of spatial effect.  
187 We obtain the position weight matrix for this cluster by aligning all k-mers in the cluster  
188 against the key k-mer.
- 189 5. All the clusters are ranked by the average sum of spatial effect of all the k-mers in the  
190 cluster.

## 191 2.6 ChIP-seq Peak Prediction Comparison

192 Gapped-kmer SVM was downloaded from [http://www.beerlab.org/gkmsvm/](http://www.beerlab.org/gkmsvm/index.html)  
193 index.html. To match with the training data for GERV, the positive training set for gapped-kmer  
194 SVM consists of the all the NF- $\kappa$ B ChIP-seq peaks on chr1-13 of GM12878 from ENCODE, and  
195 the negative training set consists of the same number of randomly sampled regions of similar size  
196 on chr1-13. The default parameter set (“-d 3”) was used. Both GERV and gapped-kmer SVM were  
197 evaluated on the same test set. The positive test set consists of all the NF- $\kappa$ B ChIP-seq peaks on  
198 chr14-22 of GM12878 from ENCODE, and the negative test set consists of the same number of  
199 randomly sampled regions of similar size on chr14-22.

## 200 2.7 Benchmark the performance in prioritizing SNPs with allele-specific binding

### 201 2.7.1 deltaSVM

202 deltaSVM source code was downloaded from [http://](http://www.beerlab.org/deltasvm/)  
203 [www.beerlab.org/deltasvm/](http://www.beerlab.org/deltasvm/). For each transcription factor included in the benchmarking, a gapped-  
204 kmer SVM model was trained using ChIP-seq peaks of that factor on chr1-13 of GM12878 from  
205 ENCODE as positive sets and the same number of randomly sampled region of similar size on chr1-  
206 13 as negative sets. The default parameter set (“-d 3”) was used. As instructed by the software, the  
207 gapped-kmer SVM model was then used to score all the possible 10-mers, the result of which was  
208 input as the kmer-weight parameter to deltaSVM.

### 209 2.7.2 sTRAP

210 We used the R version of sTRAP downloaded from the website  
211 ([http://trap.molgen.mpg.de/download/TRAP\\_R\\_package/](http://trap.molgen.mpg.de/download/TRAP_R_package/)) for scalability. The built-in JASPAR and  
212

216 TRANSFAC motif data included in the package were used. Specifically, MA0105.1, MA0105.2,  
217 MA0105.3, MA0107.1, MA0061.1, V\$NFKAPPAB\_01, V\$NFKB\_Q6, V\$NFKAPPAB65\_01,  
218 V\$NFKAPPAB50\_01, V\$P50\_Q6, V\$NFKB\_C and V\$RELA\_Q6 were used for NF- $\kappa$ B. MA0139.1,  
219 MA0531.1, V\$CTCF\_01, V\$CTCF\_02 were used for CTCF. MA0099.1, MA0099.2, MA0476.1  
220 and V\$CFOS\_Q6 were used for FOS. MA0059.1, MA0058.1, MA0058.2, PB0043.1, PB00147.1,  
221 V\$MAX\_01, V\$MAX\_04, V\$MAX\_Q6, V\$MYCMAX\_01, V\$MYCMAX\_02, V\$MYCMAX\_03  
222 and V\$MYCMAX  
223 \_B were used for MAX. MA0059.1, MA0147.1, MA0147.2, V\$CMYC\_01, V\$CMYC\_02,  
224 V\$MYC\_01, V\$MYCMAX\_01, V\$MYCMAX\_02, V\$MYC  
225 MAX\_03 and V\$MYCMAX\_B were used for MYC. None of the JUND motifs were included in the  
226 built-in motif database of sTRAP. For each variant, the scores from different matrices of the same  
227 factor were combined by taking the highest one.

### 228 229 **3 Materials**

#### 230 231 **3.1 ChIP-seq Data**

232  
233 ChIP-seq data for all the factors used in this analysis were downloaded from ENCODE. The full list  
234 of GEO accession numbers can be found in Supplementary Table S1.

#### 235 236 **3.2 DNase-seq Data**

237  
238 DNase-seq data of GM12878 were downloaded from ENCODE (GEO accession GSM816665)

#### 239 240 **3.3 Allele-Specific Binding (ASB) SNPs**

241  
242 As a gold standard for SNPs that affect TF binding, we used the list of SNPs that are reported to  
243 induce allele-specific binding (ASB) of NF- $\kappa$ B, CTCF, FOS, JUND, MAX and MYC in GM12878.  
244 The NF- $\kappa$ B ASB SNPs are collected from [25] and [13]. The ASB SNPs data for all other tran-  
245 scription factors are collected from [25]. The ASB SNPs were further filtered on allele frequency  
246 ( $\geq 0.01$ ) to keep only the common SNPs.

### 247 248 **4 Results**

#### 249 250 **4.1 GERV learns a vocabulary of k-mers that regulate factor binding**

251  
252 We first tested if GERV could predict held-out ChIP-seq data. We trained a GERV model on EN-  
253 CODE NF- $\kappa$ B ChIP-seq data and DNase-seq data from chromosomes 1-13 of GM12878, and com-  
254 pared the predicted ChIP-seq signal from GERV to actual ChIP-seq reads on the held-out chro-  
255 somes 14-22. The predicted ChIP-seq signals are very similar to actual ChIP-seq reads (Fig-  
256 ure 2A,B), with a chromosome-wide Pearson's correlation of 0.76. We measured correlation after  
257 smoothing predicted and actual reads over 400 bp windows since actual reads are insufficiently  
258 sampled to produce base-pair resolution measurements. To further examine the ability of GERV to  
259 model ChIP-seq peaks, we used the GERV model trained above to score a positive set of regions  
260 defined as all the ENCODE GM12878 NF- $\kappa$ B ChIP-seq peaks on chr14-22, and a negative set of  
261 regions defined as same number of randomly sampled region of similar length on chr14-22. Each  
262 region was scored by the sum of predicted signal in the region. We compared GERV with a previ-  
263 ously published kmer-based model for TF peak prediction by training a gapped-kmer SVM ([9]) on  
264 ENCODE NF- $\kappa$ B peaks and same number of randomly sampled region of similar length on chr1-  
265 13 of GM12878, and then performing the same scoring task on the same positive and negative set.  
266 We quantified the performance of these two models in prioritizing positive regions over negative  
267 regions by calculating the area under receiver operating characteristic curve (AUROC)(Figure 2C).  
268 Our model achieved a better AUROC of 0.972 than that of 0.949 for gapped-kmer SVM. Thus GERV  
269 learns a vocabulary of k-mers that can accurately predict the ChIP-seq data.

269 Although GERV fits a model with a potentially large parameter space ( $\pm 200$  bp window for 87380  
k-mers when  $k_{max} = 8$ ), it uses sparsifying regularization to avoid overfitting and to limit the



270  
271  
272  
273  
274  
275  
276  
277  
278  
279  
280  
281  
282  
283  
284  
285  
286  
287  
288  
289  
290  
291  
292  
293  
294  
295  
296  
297  
298  
299  
300  
301  
302  
303  
304  
305  
306  
307  
308  
309  
310  
311  
312  
313  
314  
315  
316  
317  
318  
319  
320  
321  
322  
323

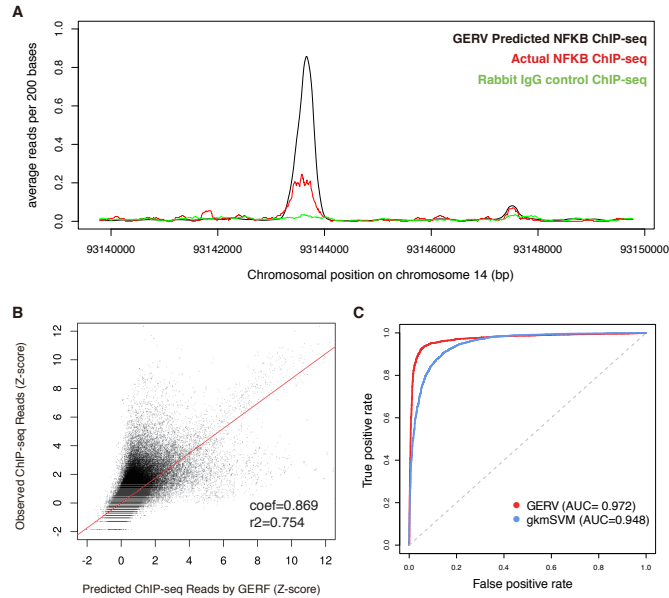

Figure 2: (A) Example held-out genomic region on chromosome 14 showing GERV-predicted NF- $\kappa$ B reads (black), actual NF- $\kappa$ B ChIP-seq reads (red), and rabbit IgG control ChIP-seq reads (green). (B) Comparison of GERV-predicted (x-axis) and observed (y-axis) NF- $\kappa$ B ChIP-seq reads in binned regions of held-out chromosome 14-22. The coefficient and  $r^2$  of a linear regression on predicted and actual z-score is plotted. (C) ROC curve for discriminating NF- $\kappa$ B peaks from negative control sets using GERV and gapped-kmer SVM (gkmSVM).

number of active k-mers (Equation 2). For example, in the NF- $\kappa$ B GERV model, most of the  $l^1$ -norm of the parameter matrix is contained in the top 1% of the 87380 k-mers (Supplementary Figure S1). GERV is also robust to the choice of the window size for a k-mer's spatial effect and DNase-seq covariates (Supplementary Table S2).

## 4.2 GERV captures the binding sequence of a TF and its co-factors

We then examined if GERV learned the sequence features important for transcription factor binding. We trained a GERV model on DNase-seq data and NF- $\kappa$ B ChIP-seq data combined from 10 LCL individuals. Position weight matrices were generated for visualization purposes by hierarchical clustering of the active k-mers in GERV (Section 2.5) and matched to known TF motifs in JASPAR and TRANSFAC using STAMP ([18]). With a threshold of significant matching at  $1e^{-7}$ , many clusters of the active k-mers correspond to known motifs (Table 1). The top two k-mer clusters for NF- $\kappa$ B were matched to motifs from NF- $\kappa$ B family (Supplementary Figure S2A), indicating that GERV correctly learned the strongest expected sequence features for the binding. Moreover, many of the other k-mer clusters learned by GERV correspond to transcription factors which have been associated with NF- $\kappa$ B regulation (Supplementary Figure S2B), including ETS1, AP1, IRF1 and SP1 ([26, 8, 2, 29]). To validate the role of these transcription factors in NF- $\kappa$ B binding, we performed co-factor analysis on the same NF- $\kappa$ B data using GEM ([10]) to search for transcription factors that have spatially binding constraint with NF- $\kappa$ B. This analysis identified AP-1 and IRF1 as the strongest co-factors of NF- $\kappa$ B binding. Interestingly, some of the active-kmer clusters in GERV were matched to transcription factors such as ELF1, ERF2, CTCF and SUT1 which have not been associated with NF- $\kappa$ B binding in previous studies.

To further interpret the role of the transcription factors whose motifs were matched to an active-kmer clusters in the NF- $\kappa$ B GERV model, we performed motif analysis on the SNPs known to alter transcription factor binding. Allele-specific binding (ASB) studies have identified SNPs associated with significantly imbalanced binding events on heterozygous sites ([25, 13]). Therefore we collected a list of 56 ASB SNPs for NF- $\kappa$ B, and use HaploReg ([31]) to query for the motifs that these ASB SNPs altered (Supplementary Table S3). Among the 56 ASB SNPs tested, only 16 (29%) were

| Cluster | Matched Motif      | Motif Database     | Matched TF   | E-value                  |
|---------|--------------------|--------------------|--------------|--------------------------|
| PWM1    | M00053<br>MA0101.1 | TRANSFAC<br>JASPAR | REL<br>REL   | 5.1842e-08<br>1.2145e-09 |
| PWM2    | M00053<br>MA0101.1 | TRANSFAC<br>JASPAR | REL<br>REL   | 7.0388e-14<br>1.1385e-12 |
| PWM3    | M00495<br>MA0099.2 | TRANSFAC<br>JASPAR | Bach1<br>API | 8.0813e-13<br>9.4186e-10 |
| PWM4    | M01111             | TRANSFAC           | RBP-Jkappa   | 6.0791e-08               |
| PWM5    | M00339<br>MA0080.2 | TRANSFAC<br>JASPAR | ETS1<br>SPI1 | 1.3508e-11<br>3.6387e-10 |
| PWM7    | M01057<br>MA0123.1 | TRANSFAC<br>JASPAR | ERF2<br>abi4 | 2.0724e-08<br>1.9650e-08 |
| PWM12   | MA0139.1           | JASPAR             | CTCF         | 1.1289e-08               |
| PWM15   | M00062<br>MA0050.1 | TRANSFAC<br>JASPAR | IRF1<br>IRF1 | 2.7655e-10<br>3.1444e-09 |
| PWM18   | MA0399.1           | JASPAR             | SUT1         | 2.7097e-08               |
| PWM20   | M00722             | TRANSFAC           | core-binding | 3.6831e-09               |
| PWM22   | MA0242.1           | JASPAR             | run_Bgb      | 3.1286e-11               |
| PWM23   | M01066             | TRANSFAC           | BLIMP1       | 1.4886e-09               |
| PWM27   | MA0453.1           | JASPAR             | nub          | 4.2762e-09               |
| PWM32   | M00345             | TRANSFAC           | GAMYB        | 8.8633e-08               |
| PWM33   | MA0344.1           | JASPAR             | NHP10        | 2.3002e-09               |
| PWM38   | MA0403.1           | JASPAR             | TBF1         | 5.6499e-08               |
| PWM43   | M00181             | TRANSFAC           | E2           | 2.9261e-08               |
| PWM49   | MA0152.1           | JASPAR             | NFATC2       | 5.3905e-11               |

Table 1: TF motifs matched to active-kmer clusters in NF- $\kappa$ B GERV model using STAMP with E-value cutoff of  $1e-07$ . For each cluster, only the strongest match in each motif database (TRANSFAC and JASPAR) is shown. PWMs are ordered by the average sum of spatial effect of all the k-mers in the corresponding cluster.

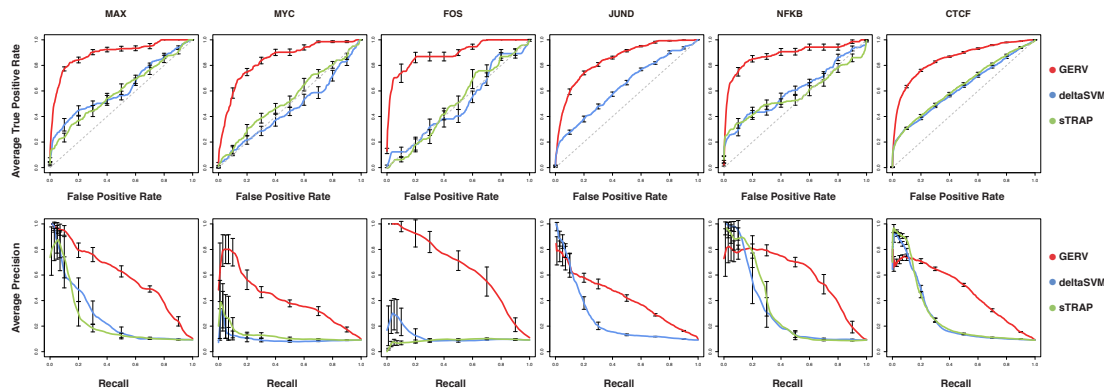

Figure 3: ROC (first row) and PRC (second row) curves for discriminating ASB SNPs from the second type of negative variant set (10 times of the size of positive set) using GERV (red), deltaSVM (blue), and sTRAP (green). Grey dashed line in ROC curves indicates random chance. In each figure, 95% confidence intervals of the true positive rate (for ROC) or precision (for PRC) are plotted. The performance of sTRAP on JUND is not measurable as JUND motif is not included in its built-in motif database.

found to alter the canonical motif of NF- $\kappa$ B, while another 11 (20%) were found to alter the TF motif matched to other active-kmer clusters in the GERV model. Thus, GERV captures the sequence context of factor binding, which provides additional descriptive power and biological insight for auxiliary elements in TF binding.

### 4.3 GERV outperforms existing approaches in prioritizing ASB SNPs

To demonstrate the power of GERV in detecting regulatory variants, we compared GERV's performance against existing approaches in discriminating ASB SNPs from negative control variants. We collected ASB SNPs with known differential binding for NF- $\kappa$ B, CTCF, JUND, MAX, MYC and FOS from previous studies ([25, 13]) as positive sets, resulting in a total of 56 SNPs for NF- $\kappa$ B, 1225 SNPs for CTCF, 26 SNPs for FOX, 233 SNPs for JUND, 71 SNPs for MAX and 69 SNPs for MYC (Section 3.3). Note that these ASB SNPs were completely held-out in the training process of any model compared in this analysis, and were only used as the test set.

For each of the six transcription factors, we constructed two types of negative SNP sets that we assume do not exhibit differential factor binding. Both kinds of negative sets are subsets of 1000 Genome Project (1KG) common (minor allele frequency  $\geq 1\%$ ) SNPs. In the first case we randomly sampled 100 negative samples for each positive sample, to get a reasonable sample of the background while making analyses computationally tractable. The second set is a fine-mapping task which is an important topic in post-GWAS analysis where a list of lead SNPs and their linked SNPs are under interrogation for regulatory consequence. To simulate such tasks, this second set was constructed as random selection of 1KG common SNPs within 10kb from any ASB SNP. To reflect the number of SNPs typically in a single LD block, we calculated LD information from phased genotype data in the 1KG pilot release using PLINK ([23]). With a  $r^2$  cutoff of 0.8, the median number of linked SNPs for a variant is 10 (Supplementary Figure S3). Thus in this set we sampled 10 negative samples for each positive sample. For both types of negative sets, we sampled 10 sets with replacement so that we could obtain the mean and confidence intervals. For each of the 10 negative sets, we constructed a paired positive set, same size as the corresponding ASB SNP set, by sampling with replacement from the ASB SNPs.

For each transcription factor, we evaluated the performance of GERV as well as two published regulatory variant scoring methods sTRAP ([19]) (motif-based), and deltaSVM ([14]) (kmer-based) in discriminating the positive set from each of the two negative sets. The other motif-based methods are not included due to either the inability to produce numerical scores for the queried variants, or the low throughput that can't scale up to thousands of SNPs. For each factor, a GERV model was trained on ENCODE ChIP-seq data from chr1-13 of GM12878, and a deltaSVM model was trained on ENCODE ChIP-seq peaks and same number of random regions of similar length on chr1-13 of GM12878. The built-in JASPAR and TRANSFAC motif dataset was used for sTRAP, which includes the motif for all the factors but JUND (Section 2.7).

We show the averaged receiver operating characteristic (ROC) curves and precision recall curves (PRC) (Supplementary Figure S4 for the first control set, Figure 3 for the second control set) of all the methods for different transcription factors and negative sets. We evaluated two aspects of the curves. The first metric is the area under curve (AUC) (Supplementary Table S4) which summarizes the overall performance in prioritizing the positive set over negative set. The second metric is the true positive rate at low false positive rate (for ROC) or the recall at high precision (for PRC), which reflects the practical need for low false discovery rate in post-GWAS analysis where thousands of lead and linked SNPs are tested for regulatory consequence. The ROC curves for GERV consistently dominated the competing methods for all factors and control scenarios, with much better AUC and higher true positive rate at low false positive rates. In PR curves because of the small size of the positive set, the confidence intervals of precision when the recall is low tend to be large, making the left-most part of the curves less informative for comparison. For transcription factor FOS, MAX and MYC, GERV achieved a PRC curve clearly superior to the others, without overlapping in the confidence interval. For factor JUND and NF- $\kappa$ B, GERV had a similarly high precision for low recall, but outperformed the other methods with consistently high precision for larger recall. For CTCF, the competing methods achieved higher precision when recalling less than 10% of the positives, but their precision dropped dramatically afterwards resulting in much lower AUC than that of GERV. Given the fact that CTCF has a motif (19 bp) more than twice as long as the maximum length of k-mer (8 bp) learnable for GERV (Section 2.2), the competitive performance on CTCF demonstrates the strong descriptive power of GERV in modeling TF binding.

We found that for our second negative control setup, choosing 50 instead of 10 negative SNPs for each positive SNP caused a noticeable decline in the area under precision recall curves (Supplementary Figure S5). With this ratio of positive to negative SNPs, deltaSVM outperformed GERV at the



432  
433  
434  
435  
436  
437  
438  
439  
440  
441  
442  
443  
444  
445  
446  
447  
448  
449  
450  
451  
452  
453  
454  
455  
456  
457  
458  
459  
460  
461  
462  
463  
464  
465  
466  
467  
468  
469  
470  
471  
472  
473  
474  
475  
476  
477  
478  
479  
480  
481  
482  
483  
484  
485

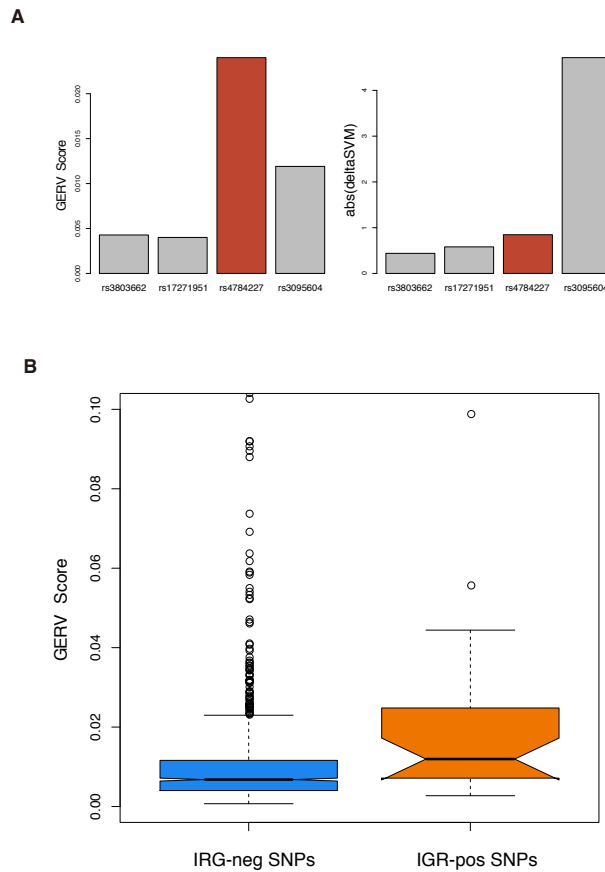

Figure 4: (A) GERV correctly predicted the effect of validated causal SNP rs4784227 on FOXA1 binding, while deltaSVM failed. (B) The 28 variants previously reported to modulate FOXA1 binding had significantly higher (Mann-Whitney U test  $P=0.001$ ) GERV scores than the rest of the AVS ( $n=1065$  after filtering for common SNPs)

10% recall point for JUND, NF- $\kappa$ B, and CTCF, but by the 30% recall point GERV produced better precision-recall for these and all other factors.

#### 4.4 GERV prioritizes linked-SNPs that modulate FOXA1 binding in breast cancer

To demonstrate the application of GERV in post-GWAS analysis, we applied GERV to a breast cancer associated variant set (AVS) collected from a previous study ([5]). It is composed of 44 risk-associated SNPs and 1,053 linked SNPs that are in strong LD with any risk-associated SNP. It has been shown that breast cancer associated SNPs are enriched for the binding sites of FOXA1, a pioneer transcription factor essential for chromatin opening and nucleosome positioning favorable to transcription factor recruitment ([11, 6, 3, 4, 16]). We trained a GERV model and a deltaSVM model on ENCODE FOXA1 ChIP-seq data from a breast cancer cell line T47D. The rs4784227 breast cancer associated SNP has been shown to disrupt the binding of FOXA1 with several lines of evidence ([5, 15]). GERV correctly predicted the effect of rs4784227 on FOXA1 binding among its linked SNPs, while deltaSVM failed (Figure 4A). Having probed a single risk-associated SNP, we then applied GERV to all the SNPs in the breast cancer AVS. The 28 variants previously reported to modulate FOXA1 binding ([5]) had significantly higher GERV scores than the rest of the AVS (Figure 4B, Mann-Whitney U test  $P=0.001$ ,  $AUC=0.69$ ). In contrast, deltaSVM couldn't distinguish the positive set from the rest of the AVS (Mann-Whitney U test  $P=0.22$ ,  $AUC=0.57$ )

## 486 5 Discussion

487

488 Despite the recent substantial advances in characterizing the genome-wide transcription factor bind-  
489 ing sites with ChIP-seq experiments, it remains a challenge to interpret variation in the noncoding  
490 region of the genome and to determine variants that cause transcription factor binding changes in  
491 post-GWAS analysis. Our work improves the prediction of causal non-coding variants when com-  
492 pared to other contemporary methods.

493 As the first generative model that directly predicts the ChIP-seq signal, GERV achieved greater  
494 accuracy than other methods in predicting ChIP-seq peaks. GERV models the spatial effect of all  
495 the k-mers and thus captures the effect of the primary motif and auxiliary sequences on TF binding.  
496 We have shown that many of these auxiliary sequences correspond to known binding cofactors,  
497 while others were matched to transcription factors whose roles in the binding regulation have not  
498 been previously characterized.

499 The generative nature of the GERV model scores each variant as the predicted change to a proximal  
500 ChIP-seq signal. The analysis on six transcription factors NF- $\kappa$ B, CTCF, FOS, JUND, MAX and  
501 MYC demonstrated that GERV outperforms existing methods in discriminating variants known to  
502 alter TF binding from negative control sets. In a few cases (Figure 3F, Supplementary Figure S4F),  
503 the discriminative nature of the competing methods equipped them with higher precision for recall-  
504 ing a small fraction of positives. However their inability to model auxiliary sequences led to the  
505 dramatic precision decrease afterwards, while GERV achieved constantly high precision for larger  
506 recall.

507 Applied to an associated variant set (AVS) of breast cancer, GERV correctly predicted the effect of  
508 previous validated causal SNP rs4784227, and highly prioritized variants reported to affect FOXA1  
509 binding in breast cancer cell line. With the superior performance exemplified in this task, we expect  
510 GERV to play an important role in functionally annotating and prioritizing putative causal variants  
511 for downstream experimental analysis

512

## 513 Acknowledgement

514

515 We thank Yuchun Guo for technical support in co-factor analysis using GEM. We also thank  
516 Matthew Edwards for many helpful comments and discussions.

517

## 518 Funding

519

520 This work was supported by the National Institutes of Health [1U01HG007037 to D.K.G.]

521

## 522 References

523

- 524 [1] Malin C Andersen, Pär G Engström, Stuart Lithwick, David Arenillas, Per Eriksson, Boris  
525 Lenhard, Wyeth W Wasserman, and Jacob Odeberg. In silico detection of sequence variations  
526 modifying transcriptional regulation. *PLoS computational biology*, 4(1):e5, January 2008.
- 527 [2] Myriam Bartels, Aike Torben Schweda, Ursula Dreikhausen, Ronald Frank, Klaus Resch, Win-  
528 fried Beil, and Mahtab Nourbakhsh. Peptide-mediated disruption of NFkappaB/NRF inter-  
529 action inhibits IL-8 gene activation by IL-1 or Helicobacter pylori. *Journal of immunology*  
530 (*Baltimore, Md. : 1950*), 179:7605–7613, 2007.
- 531 [3] Jason S Carroll, X Shirley Liu, Alexander S Brodsky, Wei Li, Clifford A Meyer, Anna J Szary,  
532 Jerome Eeckhoutte, Wenlin Shao, Eli V Hestermann, Timothy R Geistlinger, Edward A Fox,  
533 Pamela A Silver, and Myles Brown. Chromosome-wide mapping of estrogen receptor binding  
534 reveals long-range regulation requiring the forkhead protein FoxA1. *Cell*, 122(1):33–43, July  
535 2005.
- 536 [4] Jason S Carroll, Clifford A Meyer, Jun Song, Wei Li, Timothy R Geistlinger, Jérôme Eeck-  
537 houte, Alexander S Brodsky, Erika Krasnickas Keeton, Kirsten C Fertuck, Giles F Hall,  
538 Qianben Wang, Stefan Bekiranov, Victor Sementchenko, Edward A Fox, Pamela A Silver,  
539 Thomas R Gingeras, X Shirley Liu, and Myles Brown. Genome-wide analysis of estrogen  
receptor binding sites. *Nature Genetics*, 38(11):1289–1297, October 2006.

- 540 [5] Richard Cowper-Salari, Xiaoyang Zhang, Jason B Wright, Swneke D Bailey, Michael D Cole,  
541 Jerome Eeckhoute, Jason H Moore, and Mathieu Lupien. Breast cancer risk-associated SNPs  
542 modulate the affinity of chromatin for FOXA1 and alter gene expression. *Nature genetics*,  
543 44(11):1191–8, November 2012.
- 544 [6] Jérôme Eeckhoute, Jason S Carroll, Timothy R Geistlinger, Maria I Torres-Arzayus, and Myles  
545 Brown. A cell-type-specific transcriptional network required for estrogen regulation of cy-  
546 clin D1 and cell cycle progression in breast cancer. *Genes & development*, 20(18):2513–26,  
547 September 2006.
- 548 [7] Kelly a Frazer, Sarah S Murray, Nicholas J Schork, and Eric J Topol. Human genetic variation  
549 and its contribution to complex traits. *Nature reviews. Genetics*, 10(4):241–51, April 2009.
- 550 [8] Shuichi Fujioka, Jiangong Niu, Christian Schmidt, M Guido, Bailu Peng, Tadashi Uwagawa,  
551 Zhongkui Li, Douglas B Evans, James L Abbruzzese, Paul J Chiao, and Guido M Sclabas. NF- $\kappa$ B  
552 and AP-1 Connection: Mechanism of NF- $\kappa$ B-Dependent Regulation of AP-1 Activity.  
553 *Society*, 24(17):7806–7819, 2004.
- 554 [9] Mahmoud Ghandi, Dongwon Lee, Morteza Mohammad-Noori, and Michael A Beer. Enhanced  
555 regulatory sequence prediction using gapped k-mer features. *PLoS computational biology*,  
556 10(7):e1003711, July 2014.
- 557 [10] Yuchun Guo, Shaun Mahony, and David K Gifford. High resolution genome wide binding  
558 event finding and motif discovery reveals transcription factor spatial binding constraints. *PLoS*  
559 *computational biology*, 8(8):e1002638, January 2012.
- 560 [11] Housheng Hansen He, Clifford A Meyer, Hyunjin Shin, Shannon T Bailey, Gang Wei, Qianben  
561 Wang, Yong Zhang, Kexin Xu, Min Ni, Mathieu Lupien, Piotr Mieczkowski, Jason D Lieb,  
562 Keji Zhao, Myles Brown, and X Shirley Liu. Nucleosome dynamics define transcriptional  
563 enhancers. *Nature genetics*, 42(4):343–7, April 2010.
- 564 [12] Lucia a Hindorff, Praveen Sethupathy, Heather a Junkins, Erin M Ramos, Jayashri P Mehta,  
565 Francis S Collins, and Teri a Manolio. Potential etiologic and functional implications of  
566 genome-wide association loci for human diseases and traits. *Proceedings of the National*  
567 *Academy of Sciences of the United States of America*, 106(23):9362–7, June 2009.
- 568 [13] Konrad J Karczewski, Joel T Dudley, Kimberly R Kukurba, Rong Chen, Atul J Butte,  
569 Stephen B Montgomery, and Michael Snyder. Systematic functional regulatory assessment  
570 of disease-associated variants. *Proceedings of the National Academy of Sciences of the United*  
571 *States of America*, 110(23):9607–12, June 2013.
- 572 [14] Dongwon Lee, David U Gorkin, Maggie Baker, Benjamin J Strober, Alessandro L Asoni,  
573 Andrew S McCallion, and Michael a Beer. A method to predict the impact of regulatory  
574 variants from DNA sequence. *Nature Genetics*, (June), 2015.
- 575 [15] Jirong Long, Qiuyin Cai, Xiao-Ou Shu, Shimian Qu, Chun Li, Ying Zheng, Kai Gu, Wenjing  
576 Wang, Yong-Bing Xiang, Jiarong Cheng, Kexin Chen, Lina Zhang, Hong Zheng, Chen-Yang  
577 Shen, Chiun-Sheng Huang, Ming-Feng Hou, Hongbing Shen, Zhibin Hu, Furu Wang, Sandra L  
578 Deming, Mark C Kelley, Martha J Shrubsole, Ui Soon Khoo, Kelvin Y K Chan, Sum Yin  
579 Chan, Christopher A Haiman, Brian E Henderson, Loic Le Marchand, Motoki Iwasaki, Yoshio  
580 Kasuga, Shoichiro Tsugane, Keitaro Matsuo, Kazuo Tajima, Hiroji Iwata, Bo Huang, Jiajun  
581 Shi, Guoliang Li, Wanqing Wen, Yu-Tang Gao, Wei Lu, and Wei Zheng. Identification of a  
582 functional genetic variant at 16q12.1 for breast cancer risk: results from the Asia Breast Cancer  
583 Consortium. *PLoS genetics*, 6(6):e1001002, June 2010.
- 584 [16] Mathieu Lupien, Jérôme Eeckhoute, Clifford A. Meyer, Qianben Wang, Yong Zhang, Wei Li,  
585 Jason S. Carroll, X. Shirley Liu, and Myles Brown. FoxA1 Translates Epigenetic Signatures  
586 into Enhancer-Driven Lineage-Specific Transcription. *Cell*, 132(6):958–970, March 2008.
- 587 [17] Geoff Macintyre, James Bailey, Izhak Haviv, and Adam Kowalczyk. is-rSNP: a novel tech-  
588 nique for in silico regulatory SNP detection. *Bioinformatics (Oxford, England)*, 26(18):i524–  
589 30, September 2010.
- 590 [18] Shaun Mahony and Panayiotis V. Benos. STAMP: A web tool for exploring DNA-binding  
591 motif similarities. *Nucleic Acids Research*, 35:253–258, 2007.
- 592 [19] Thomas Manke, Matthias Heinig, and Martin Vingron. Quantifying the effect of sequence  
593 variation on regulatory interactions. *Human mutation*, 31(4):477–83, April 2010.

- 594 [20] Teri A Manolio. Genomewide association studies and assessment of the risk of disease. *The*  
595 *New England journal of medicine*, 2010.
- 596 [21] Mark I McCarthy, Gonçalo R Abecasis, Lon R Cardon, David B Goldstein, Julian Little, John  
597 P a Ioannidis, and Joel N Hirschhorn. Genome-wide association studies for complex traits:  
598 consensus, uncertainty and challenges. *Nature reviews. Genetics*, 9(5):356–69, May 2008.
- 599 [22] Ivan Molineris, Davide Schiavone, Fabio Rosa, Giuseppe Matullo, Valeria Poli, and Paolo  
600 Provero. Identification of functional cis-regulatory polymorphisms in the human genome. *Hu-*  
601 *man mutation*, 34(5):735–42, May 2013.
- 602 [23] Shaun Purcell, Benjamin Neale, Kathe Todd-Brown, Lori Thomas, Manuel A R Ferreira, David  
603 Bender, Julian Maller, Pamela Sklar, Paul I W de Bakker, Mark J Daly, and Pak C Sham.  
604 PLINK: a tool set for whole-genome association and population-based linkage analyses. *Amer-*  
605 *ican journal of human genetics*, 81(3):559–75, September 2007.
- 606 [24] Alberto Riva. Large-scale computational identification of regulatory SNPs with rSNP-  
607 MAPPER. *BMC genomics*, 13 Suppl 4(Suppl 4):S7, January 2012.
- 608 [25] Joel Rozowsky, Alexej Abyzov, Jing Wang, Pedro Alves, Debasish Raha, Arif Harmanci, Jing  
609 Leng, Robert Bjornson, Yong Kong, Naoki Kitabayashi, Nitin Bhardwaj, Mark Rubin, Michael  
610 Snyder, and Mark Gerstein. AlleleSeq: analysis of allele-specific expression and binding in a  
611 network framework. *Molecular systems biology*, 7(522):522, January 2011.
- 612 [26] Marco Sgarbanti, Anna L Remoli, Giulia Marsili, Barbara Ridolfi, Alessandra Borsetti, Edvige  
613 Perrotti, Roberto Orsatti, Ramona Ilari, Leonardo Sernicola, Emilia Stellacci, Barbara Ensoli,  
614 and Angela Battistini. IRF-1 is required for full NF-kappaB transcriptional activity at the  
615 human immunodeficiency virus type 1 long terminal repeat enhancer. *Journal of virology*,  
616 82(7):3632–3641, 2008.
- 617 [27] Barbara E Stranger, Eli a Stahl, and Towfique Raj. Progress and promise of genome-wide  
618 association studies for human complex trait genetics. *Genetics*, 187(2):367–83, February 2011.
- 619 [28] Mingxiang Teng, Shoji Ichikawa, Leah R. Padgett, Yadong Wang, Matthew Mort, David N.  
620 Cooper, Daniel L. Koller, Tatiana Foroud, Howard J. Edenberg, Michael J. Econs, and Yunlong  
621 Liu. Regsnps: A strategy for prioritizing regulatory single nucleotide substitutions. *Bioinfor-*  
622 *matics*, 28(14):1879–1886, 2012.
- 623 [29] R S Thomas, M J Tymms, L H McKinlay, M F Shannon, a Seth, and I Kola. ETS1, NFkappaB  
624 and AP1 synergistically transactivate the human GM-CSF promoter. *Oncogene*, 14:2845–  
625 2855, 1997.
- 626 [30] Lucas D Ward and Manolis Kellis. HaploReg: a resource for exploring chromatin states,  
627 conservation, and regulatory motif alterations within sets of genetically linked variants. *Nucleic*  
628 *acids research*, 40(Database issue):D930–4, January 2012.
- 629 [31] Lucas D Ward and Manolis Kellis. Interpreting noncoding genetic variation in complex traits  
630 and human disease. *Nature biotechnology*, 30(11):1095–106, November 2012.
- 631  
632  
633  
634  
635  
636  
637  
638  
639  
640  
641  
642  
643  
644  
645  
646  
647
